# Supplementary material for: A stepping stone to compositionality in chimpanzee communication
Source: PeerJ. 2019 Sep 12;7:e7623. doi: 10.7717/peerj.7623 (PMC6745191; doi:10.7717/peerj.7623)
Supplement: Supplemental Information 1 [file peerj-07-7623-s001.xlsx]

## Sheet: Rawdata
Dataset	event	clip_old	time	initiator	group	sex_init	ini_approaching	recipient	sex_rec	dyad	rel_dom	face	context_dyad	GEST	REACT
2015	4	clip014.mp4	00:18:00	Tess	2	female	yes	Vis	male	Tes-Vis	todom	hoot	pos	BG	affil
2015	7	clip023.mp4	00:07:00	Tess	2	female	yes	Zsabu	male	Tes-Zsa	todom	hoot	pos	BG	affil
2015	8	clip027.mp4	00:08:00	Taylor	2	female	yes	Zsabu	male	Tay-Zsa	todom	hoot	pos	BG	affil
2015	9	clip029.mp4	00:09:00	LittleJudy	2	female	no	LittleJane	female	Jud-Jan	nottodom	bared	pos	BG	affil
2015	10	clip029.mp4	00:10:00	Maggie	2	female	no	Diana	female	Mag-Dia	nottodom	bared	pos	SG	affil
2015	11	clip030.mp4	00:18:00	LittleJenkins	2	female	no	Maggie	female	Jen-Mag	nottodom	NA	pos	BG	NA
2015	12	clip038.mp4	00:10:00	Diana	2	female	yes	LittleJudy	female	Dia-Jud	nottodom	bared	neg	SG	avoid
2015	14	clip040.mp4	00:15:00	Nina	2	female	no	Tilly	female	Nin-Til	todom	hoot	NA	SG	avoid
2015	15	clip051.mp4	00:10:00	Dora	2	female	yes	Zsabu	male	Dor-Zsa	todom	hoot	pos	SG	avoid
2015	16	clip066.mp4	00:12:00	Tara	1	male	no	Booboo	male	Tar-Boo	nottodom	bared	pos	BG	affil
2015	17	clip069.mp4	00:14:00	Ingrid	1	female	no	Brenda	female	Ing-Bre	nottodom	bared	pos	BG	affil
2015	19	clip074.mp4	00:13:00	Tilly	2	female	no	Pan	male	Til-Pan	todom	NA	pos	SG	avoid
2015	20	clip078.mp4	00:10:00	Maxine	2	female	yes	Misha	female	Maxi-Mis	todom	bared	NA	BG	avoid
2015	21	clip079.mp4	00:11:00	Misha	2	female	no	Tess	female	Mis-Tes	nottodom	bared	neg	SG	avoid
2015	22	clip079.mp4	00:19:00	Misha	2	female	yes	Trixi	female	Mis-Tri	nottodom	bared	neg	SG	avoid
2015	23	clip081.mp4	00:14:00	Tobar	1	male	yes	Girly	female	Tob-Gir	nottodom	neutral	pos	BG	affil
2015	26	clip095.mp4	00:20:00	LittleJones	2	male	no	LongJohn	male	Jon-Joh	nottodom	NA	pos	SG	affil
2015	27	clip103.mp4	00:10:00	Dora	2	female	no	Nina	female	Dor-Nin	nottodom	NA	pos	BG	affil
2015	29	clip106.mp4	00:18:00	Nina	2	female	no	Doug	male	Nin-Dou	todom	hoot	pos	BG	affil
2015	34	clip128.mp4	00:10:00	LittleJenkins	2	female	no	Danny	male	Jen-Dan	nottodom	NA	pos	SG	affil
2015	35	clip133.mp4	00:16:00	Danny	2	male	no	Dora	female	Dan-Dor	nottodom	bared	pos	SG	affil
2015	38	clip141.mp4	00:14:00	Taylor	2	female	no	LittleJudy	female	Tay-Jud	todom	bared	neg	BG	avoid
2015	39	clip144.mp4	00:10:00	Doug	2	male	yes	Zsabu	male	Dou-Zsa	todom	hoot	NA	SG	avoid
2015	41	clip148.mp4	00:11:00	Maggie	2	female	no	Noel	female	Mag-Noe	todom	bared	pos	SG	affil
2015	43	clip162.mp4	00:51:00	Doug	2	male	no	Maggie	female	Dou-Mag	nottodom	NA	pos	SG	affil
2015	44	clip163.mp4	00:14:00	Trixi	2	female	yes	Darwin	male	Tri-Dar	nottodom	bared	pos	BG	avoid
2015	46	clip164.mp4	00:05:00	Trixi	2	female	no	Nina	male	Tri-Nin	todom	bared	pos	BG	avoid
2015	47	clip166.mp4	00:25:00	LongJohn	2	male	yes	Zsabu	male	Joh-Zsa	todom	bared	pos	BG	avoid
2015	48	clip166.mp4	00:51:00	Dora	2	female	yes	Zsabu	male	Dor-Zsa	todom	hoot	pos	BG	affil
2015	49	clip166.mp4	01:39:00	Doug	2	male	yes	Zsabu	male	Dou-Zsa	todom	NA	pos	SG	avoid
2015	51	clip178.mp4	00:23:00	Rita	1	female	no	Booboo	male	Rit-Boo	todom	NA	pos	BG	affil
2015	53	clip192.mp4	00:11:00	Masya	2	female	no	Nikkie	female	Mas-Nik	nottodom	hoot	pos	SG	avoid
2015	54	clip194.mp4	00:50:00	Doug	2	male	yes	Zsabu	male	Dou-Zsa	todom	hoot	pos	SG	affil
2015	55	clip194.mp4	00:54:00	Max	2	male	yes	Zsabu	male	Max-Zsa	todom	bared	pos	BG	avoid
2015	56	clip194.mp4	02:05:00	Tess	2	female	no	Zsabu	male	Tes-Zsa	todom	NA	pos	BG	affil
2015	57	clip197.mp4	00:23:00	Tess	2	female	no	LongJohn	male	Tes-Joh	nottodom	hoot	pos	BG	affil
2015	59	clip217.mp4	00:11:00	Regina	1	female	yes	Gerard	male	Reg-Ger	todom	hoot	pos	BG	affil
2015	61	clip226.mp4	00:05:00	LittleJones	2	male	yes	Zsabu	male	Jon-Zsa	todom	NA	pos	BG	affil
2015	62	clip227.mp4	00:07:00	Dora	2	female	yes	Zsabu	male	Dor-Zsa	todom	NA	pos	BG	avoid
2015	64	clip232.mp4	00:09:00	LittleJudy	2	female	no	LittleJack	male	Jud-Jac	nottodom	neutral	pos	SG	affil
2015	65	clip239.mp4	00:14:00	LittleJane	2	female	yes	Pan	male	Jan-Pan	todom	NA	pos	BG	avoid
2015	66	clip239.mp4	00:16:00	Violet	2	female	yes	Pan	male	Vio-Pan	todom	NA	pos	BG	avoid
2015	67	clip242.mp4	00:21:00	LittleJudy	2	female	no	Dolly	female	Jud-Dol	todom	NA	pos	BG	avoid
2015	69	clip245.mp4	00:03:00	LongJohn	2	male	yes	LittleJack	male	Joh-Jac	nottodom	NA	pos	SG	affil
2015	70	clip258.mp4	00:19:00	Tara	1	male	no	Girly	female	Tar-Gir	nottodom	NA	pos	SG	affil
2015	71	clip261.mp4	00:34:00	Booboo	1	male	no	Tara	male	Boo-Tar	todom	neutral	pos	BG	affil
2015	72	clip263.mp4	00:13:00	LittleJane	2	female	yes	Zsabu	male	Jan-Zsa	todom	bared	pos	BG	affil
2015	77	clip271.mp4	00:26:00	Ingrid	1	female	no	Tobar	male	Ing-Tob	todom	NA	pos	SG	affil
2015	78	clip271.mp4	00:28:00	Tobar	1	male	yes	Gerard	male	Tob-Ger	nottodom	NA	pos	BG	affil
2015	79	clip274.mp4	00:28:00	LittleJudy	2	female	yes	Pan	male	Jud-Pan	todom	bared	pos	BG	avoid
2015	80	clip275.mp4	00:10:00	Charity	2	female	no	Dolly	female	Cha-Dol	nottodom	bared	pos	BG	avoid
2015	82	clip278.mp4	00:08:00	Carol	2	female	no	LittleJones	male	Car-Jon	nottodom	bared	pos	SG	affil
2015	83	clip278.mp4	00:13:00	LittleJane	2	female	no	Carol	female	Jan-Car	nottodom	NA	neg	BG	avoid
2015	84	clip284.mp4	00:13:00	Tara	1	male	no	Bob	male	Tar-Bob	nottodom	hoot	pos	SG	avoid
2015	85	clip285.mp4	00:14:00	Tara	1	male	yes	Bob	male	Tar-Bob	nottodom	hoot	pos	SG	avoid
2015	86	clip288.mp4	00:09:00	Tara	1	male	no	Girly	female	Tar-Gir	nottodom	neutral	pos	SG	affil
2015	87	clip289.mp4	00:13:00	Tara	1	male	no	Girly	female	Tar-Gir	nottodom	neutral	pos	SG	affil
2015	88	clip289.mp4	00:17:00	Girly	1	female	no	Tara	male	Gir-Tar	todom	neutral	pos	BG	affil
2015	89	clip292.mp4	00:08:00	Innocentia	1	female	no	Ireen	female	Inn-Ire	nottodom	NA	NA	SG	affil
2015	91	clip301.mp4	00:06:00	Doug	2	male	no	LittleJack	male	Dou-Jac	nottodom	NA	pos	SG	affil
2015	92	clip303.mp4	00:04:00	Mavis	2	male	yes	LittleJack	male	Mav-Jac	nottodom	NA	pos	SG	affil
2015	94	clip311.mp4	00:16:00	LittleJenkins	2	female	yes	Zsabu	male	Jen-Zsa	todom	hoot	pos	BG	affil
2015	96	clip312.mp4	00:06:00	LongJohn	2	male	yes	Zsabu	male	Joh-Zsa	todom	hoot	pos	BG	avoid
2015	97	clip313.mp4	00:11:00	Debbie	2	female	yes	Pan	male	Deb-Pan	todom	NA	pos	SG	affil
2015	101	clip320.mp4	00:02:00	Tobar	1	male	yes	Tara	male	Tob-Tar	todom	NA	pos	SG	avoid
2015	102	clip320.mp4	00:04:00	Tobar	1	male	yes	Booboo	male	Tob-Boo	NA	NA	pos	SG	avoid
2015	103	clip323.mp4	00:07:00	Toni	2	female	no	Nina	female	Ton-Nin	NA	NA	neg	BG	avoid
2015	105	clip323.mp4	00:26:00	Pippa	2	female	yes	Toni	female	Pip-Ton	nottodom	bared	NA	BG	avoid
2015	109	clip331.mp4	00:21:00	Regina	1	female	no	Rachel	female	Reg-Rac	nottodom	bared	neg	BG	affil
2015	110	clip336.mp4	00:14:00	Ireen	1	female	no	Innocentia	female	Ire-Inn	todom	NA	pos	SG	affil
2015	112	clip340.mp4	00:08:00	BJ	1	female	yes	Bob	male	BJ-Bob	todom	neutral	pos	BG	avoid
2015	113	clip345.mp4	00:06:00	Gerard	1	male	no	Rachel	female	Ger-Rac	nottodom	neutral	pos	SG	affil
2015	116	clip348.mp4	00:53:00	Carol	2	female	yes	Zsabu	male	Car-Zsa	todom	NA	pos	BG	avoid
2015	118	clip348.mp4	01:09:00	LittleJane	2	female	yes	Zsabu	male	Jan-Zsa	todom	NA	pos	SG	affil
2015	119	clip349.mp4	00:41:00	BJ	1	female	yes	Ilse	female	BJ-Ils	nottodom	neutral	pos	BG	avoid
2015	120	clip351.mp4	00:24:00	Zsabu	2	male	no	Pan	male	Zsa-Pan	nottodom	bared	pos	SG	affil
2015	122	clip353.mp4	00:11:00	Maggie	2	female	no	Pan	male	Mag-Pan	todom	neutral	pos	SG	avoid
2015	123	clip359.mp4	00:12:00	Rusty	1	male	yes	Bob	male	Rus-Bob	todom	NA	pos	BG	avoid
2015	124	clip375.mp4	00:07:00	Renate	1	female	yes	Rachel	female	Ren-Rac	nottodom	neutral	pos	SG	affil
2015	125	clip376.mp4	00:11:00	Tobar	1	male	no	Bob	male	Tob-Bob	todom	hoot	pos	SG	affil
2015	127	clip385.mp4	00:08:00	Regina	1	female	yes	Bob	male	Reg-Bob	todom	neutral	pos	BG	avoid
2015	129	clip388.mp4	00:13:00	Pan	2	male	no	Maggie	female	Pan-Mag	nottodom	neutral	pos	BG	affil
2015	130	clip393.mp4	00:06:00	Ingrid	1	female	no	Innocentia	female	Ing-Inn	nottodom	NA	pos	BG	affil
2015	132	clip395.mp4	00:11:00	Nina	2	female	no	Debbie	female	Nin-Deb	nottodom	NA	pos	SG	affil
2015	133	clip397.mp4	00:07:00	Pan	1	male	no	Zsabu	male	Pan-Zsa	todom	NA	pos	SG	affil
2015	137	clip410.mp4	00:08:00	Rusty	1	male	yes	Girly	female	Rus-Gir	todom	neutral	pos	BG	affil
2015	138	clip414.mp4	00:10:00	Genny	1	female	yes	Bob	male	Gen-Bob	todom	hoot	pos	BG	avoid
2015	139	clip416.mp4	01:12:00	Tara	1	male	no	Bob	male	Tar-Bob	nottodom	hoot	pos	SG	affil
2015	140	clip419.mp4	00:07:00	Renate	1	female	yes	Bob	male	Ren-Bob	todom	NA	pos	SG	avoid
2015	141	clip419.mp4	00:13:00	Rita	1	female	no	Bob	male	Rit-Bob	todom	bared	pos	SG	affil
2015	142	clip423.mp4	00:19:00	LittleJane	2	female	yes	Pan	male	Jan-Pan	todom	hoot	pos	BG	avoid
2015	143	clip423.mp4	00:21:00	LittleJane	2	female	no	Misha	female	Jan-Mis	nottodom	hoot	pos	SG	avoid
2015	144	clip424.mp4	00:12:00	Charity	2	female	no	Maggie	female	Cha-Mag	nottodom	NA	pos	SG	avoid
2015	145	clip426.mp4	00:16:00	Ingrid	1	female	yes	Gerard	male	Ing-Ger	todom	NA	pos	SG	affil
2015	146	clip427.mp4	00:12:00	Tara	1	male	no	Girly	female	Tar-Gir	nottodom	NA	pos	BG	avoid
2015	147	clip437.mp4	00:14:00	Gonzaga	1	male	no	Rusty	male	Gon-Rus	todom	neutral	pos	BG	affil
2015	148	clip450.mp4	00:11:00	Doug	2	male	yes	Zsabu	male	Dou-Zsa	todom	hoot	pos	SG	avoid
2015	150	clip451.mp4	00:11:00	Debbie	2	female	yes	Zsabu	male	Deb-Zsa	todom	NA	pos	SG	avoid
2015	151	clip453.mp4	00:14:00	LittleJane	2	female	no	Misha	female	Jan-Mis	nottodom	NA	neg	SG	avoid
2015	152	clip456.mp4	00:07:00	Debbie	2	female	no	Max	male	Deb-Max	nottodom	NA	NA	BG	NA
2015	155	clip458.mp4	00:05:00	Max	2	male	yes	Zsabu	male	Max-Zsa	todom	NA	pos	BG	avoid
2015	156	clip458.mp4	00:14:00	Tess	2	female	no	Zsabu	male	Tes-Zsa	todom	NA	pos	BG	avoid
2015	158	clip471.mp4	00:27:00	Brenda	1	female	yes	Bob	male	Bre-Bob	todom	NA	pos	BG	avoid
2015	160	clip477.mp4	00:19:00	Mojo	2	male	yes	Zsabu	male	Moj-Zsa	todom	hoot	pos	BG	affil
2015	161	clip478.mp4	00:14:00	Taylor	2	female	yes	Zsabu	male	Tay-Zsa	todom	hoot	pos	BG	avoid
2015	162	clip482.mp4	00:23:00	Taylor	2	female	yes	Zsabu	male	Tay-Zsa	todom	bared	pos	BG	avoid
2015	164	clip490.mp4	01:12:00	LittleJenkins	2	female	no	LittleJane	female	Jen-Jan	todom	bared	pos	SG	affil
2015	165	clip490.mp4	01:13:00	LittleJane	2	female	yes	LitteJenkins	female	Jan-Jen	nottodom	NA	pos	SG	affil
2015	167	clip500.mp4	00:08:00	Tara	1	male	yes	Bob	male	Tar-Bob	nottodom	neutral	pos	SG	avoid
2015	168	clip503.mp4	00:22:00	Tess	2	female	no	LittleJenkins	female	Tes-Jen	nottodom	NA	pos	SG	affil
2015	169	clip508.mp4	00:08:00	LittleJane	2	female	no	LitteJenkins	female	Jan-Jen	nottodom	neutral	pos	SG	affil
2015	170	clip513.mp4	00:17:00	LongJohn	2	male	no	LittleJack	male	Joh-Jac	nottodom	NA	pos	SG	affil
2015	171	clip517.mp4	00:18:00	Taylor	2	female	yes	Pan	male	Tay-Pan	todom	hoot	pos	BG	avoid
2015	174	clip519.mp4	00:21:00	Maggie	2	female	no	Tess	female	Mag-Tes	nottodom	neutral	pos	BG	affil
2015	176	clip524.mp4	00:22:00	Mojo	2	male	yes	Zsabu	male	Moj-Zsa	todom	NA	pos	BG	avoid
2015	177	clip525.mp4	00:09:00	Darwin	2	male	no	Zsabu	male	Dar-Zsa	todom	hoot	pos	BG	avoid
2015	181	clip528.mp4	00:10:00	Tara	1	male	no	Ireen	female	Tar-Ire	nottodom	neutral	pos	SG	affil
2016	1	1	00:06:00	Booboo	1	male	yes	Bob	male	Boo-Bob	nottodom	NA	pos	SG	NA
2016	2	2	00:01:00	Booboo	1	male	no	Rachel	female	Boo-Rac	nottodom	neutral	pos	SG	affil
2016	3	2	00:06:00	Rachel	1	female	yes	Booboo	male	Rac-Boo	todom	NA	pos	BG	affil
2016	4	3	00:01:00	Rita	1	female	no	Tobar	male	Rit-Tob	todom	NA	pos	SG	avoid
2016	6	4	00:06:00	Tara	1	male	yes	Booboo	male	Tar-Boo	nottodom	neutral	pos	BG	affil
2016	7	5	00:03:00	Brenda	1	female	no	Bob	male	Bre-Bob	todom	neutral	pos	SG	avoid
2016	9	6	00:08:00	Gonzaga	1	male	no	Bob	male	Gon-Bob	todom	neutral	pos	SG	avoid
2016	10	6	00:15:00	Chrissy	1	female	no	Bob	male	Chr-Bob	todom	neutral	pos	SG	avoid
2016	11	8	00:03:00	Ilse	1	female	no	Brenda	female	Ils-Bre	NA	NA	pos	BG	affil
2016	12	9	00:03:00	Maggie	2	female	no	Zsabu	male	Mag-Zsa	todom	hoot	pos	SG	avoid
2016	16	13	00:03:00	Masya	2	female	no	LittleJudy	female	Mas-Jud	todom	neutral	pos	BG	avoid
2016	19	16	00:02:00	Doug	2	male	no	Zsabu	male	Dou-Zsa	todom	hoot	pos	SG	avoid
2016	22	17	00:07:00	Mojo	2	male	no	David	male	Moy-Dav	todom	neutral	pos	SG	affil
2016	25	21	00:06:00	LittleJenkins	2	female	no	Masya	female	Jen-Jud	todom	NA	neg	SG	avoid
2016	26	22	00:03:00	LittleJane	2	female	no	Misha	female	Jan-Jud	nottodom	hoot	pos	SG	avoid
2016	27	24	00:05:00	Maggie	2	female	no	Masya	female	Mag-Mas	nottodom	neutral	pos	BG	affil
2016	28	24	00:06:00	Masya	2	female	yes	Maggie	female	Mas-Mag	todom	neutral	pos	BG	affil
2016	45	36	00:12:00	Tess	2	female	no	Toni	female	Tes-Ton	nottodom	hoot	pos	BG	avoid
2016	48	42	00:04:00	BJ	1	female	no	Renate	female	BJ-Ren	todom	NA	pos	BG	avoid
2016	49	45	00:05:00	Mike	2	male	yes	Zsabu	male	Mik-Zsa	todom	neutral	pos	BG	avoid
2016	75	88	00:09:00	Chrissy	1	female	no	Bob	male	Chr-Bob	todom	neutral	pos	SG	avoid
2016	80	111	00:07:00	Gerard	1	male	yes	Bob	male	Ger-Bob	todom	hoot	pos	BG	avoid
2016	88	115	00:06:00	Debbie	2	female	no	Pan	male	Deb-Pan	todom	neutral	pos	BG	avoid
2016	94	130	00:08:00	Gerard	1	male	yes	Tara	male	Ger-Tar	todom	neutral	pos	BG	affil
2016	98	142	00:06:00	LittleJudy	2	female	yes	Mike	male	Jud-Mik	todom	neutral	pos	SG	avoid
2016	104	151	00:02:00	Nina	2	female	no	Debbie	female	Nin-Deb	todom	neutral	pos	BG	avoid
2016	106	153	00:03:00	Chrissy	1	female	yes	Genny	female	Chr-Gen	todom	hoot	pos	SG	avoid
2016	107	153	00:19:00	Rachel	1	female	yes	Bob	male	Rac-Bob	todom	hoot	pos	SG	avoid
2016	110	155	00:21:00	Gerard	1	male	yes	Bob	male	Ger-Bob	todom	NA	pos	SG	NA
2016	113	158	00:12:00	Tess	2	female	no	Zsabu	male	Tes-Zsa	todom	hoot	pos	SG	avoid
2016	114	159	00:04:00	Zsabu	2	male	no	Noel	female	Zsa-Noe	todom	neutral	neg	BG	NA
2016	116	161	00:06:00	Daisy	2	female	yes	Zsabu	male	Dai-Zsa	todom	NA	pos	SG	affil
2016	117	161	00:10:00	Daisy	2	female	yes	Zsabu	male	Dai-Zsa	todom	NA	pos	SG	avoid
2016	122	165	00:01:00	Debbie	2	female	NA	Pan	male	Deb-Pan	todom	NA	pos	BG	affil
2016	125	167	00:00:00	Renate	1	female	NA	Pal	male	Ren-Pal	todom	NA	pos	SG	avoid
2016	128	169	00:01:00	Ingrid	1	female	NA	Booboo	male	Ing-Boo	todom	NA	pos	BG	affil
2016	129	170	00:04:00	Ingrid	1	female	yes	Pal	male	Ing-Pal	todom	hoot	pos	BG	avoid
2016	130	170	00:05:00	Ingrid	1	female	yes	Pal	male	Ing-Pal	todom	hoot	pos	SG	avoid
2016	131	171	00:06:00	Girly	1	female	yes	Pal	male	Gir-Pal	todom	neutral	pos	BG	affil
2016	132	171	00:07:00	Pal	1	male	no	Girly	female	Pal-Gir	nottodom	neutral	pos	SG	affil
2016	133	171	00:02:00	Debbie	2	female	no	Zsabu	male	Deb-Zsa	todom	hoot	pos	BG	avoid
2016	136	175	00:05:00	Violet	2	female	no	Debbie	female	Vio-Deb	NA	neutral	pos	SG	avoid
2016	137	176	00:05:00	Booboo	1	male	no	Bob	male	Boo-Bob	todom	neutral	pos	BG	avoid
2016	138	178	00:05:00	Ingrid	1	female	yes	Bob	male	Ing-Bob	todom	NA	pos	SG	avoid
2016	139	178	00:09:00	Ingrid	1	female	yes	Bob	male	Ing-Bob	todom	NA	pos	SG	avoid
2016	140	179	00:03:00	Ingrid	1	female	yes	Bob	male	Ing-Bob	todom	neutral	pos	BG	avoid
2016	141	179	00:03:00	Ingrid	1	female	yes	Bob	male	Ing-Bob	todom	neutral	pos	BG	affil
2016	142	179	00:30:00	Ingrid	1	female	no	Tara	male	Ing-Tar	todom	NA	pos	SG	avoid
2016	143	179	00:37:00	Ingrid	1	female	no	Tara	male	Ing-Tar	todom	neutral	pos	SG	avoid
2016	145	182	00:09:00	LittleJane	2	female	yes	Zsabu	male	Jan-Zsa	todom	NA	pos	BG	avoid
2016	146	183	00:03:00	LittleJane	2	female	no	Zsabu	male	Jan-Zsa	todom	NA	pos	BG	avoid
2016	151	188	00:03:00	Bob	1	male	yes	Rusty	male	Bob-Rus	nottodom	NA	pos	SG	avoid
2016	154	190	00:04:00	Rusty	1	male	no	Rita	female	Rus-Rit	todom	NA	pos	SG	avoid
2016	157	193	00:03:00	Dora	2	female	no	Martin	male	Dor-Mar	nottodom	neutral	pos	BG	affil
2016	159	193	00:17:00	Mojo	2	male	no	Coco	female	Moj-Coc	todom	neutral	pos	BG	avoid
2016	161	197	00:06:00	Tess	2	female	yes	Zsabu	male	Tes-Zsa	todom	NA	pos	BG	avoid
2016	162	197	00:06:00	Tess	2	female	yes	Zsabu	male	Tes-Zsa	todom	hoot	pos	SG	avoid
2016	165	203	00:11:00	Ingrid	1	female	no	Tobar	male	Ing-Tob	NA	NA	pos	BG	avoid
2016	167	210	00:09:00	Innocentia	1	female	yes	Bob	male	Inn-Bob	todom	hoot	pos	SG	affil
2016	168	210	00:11:00	Gonzaga	1	female	no	Bob	male	Gon-Bob	todom	neutral	pos	SG	avoid
2016	170	212	00:04:00	Ingrid	1	female	no	Tara	male	Ing-Tar	todom	NA	pos	SG	avoid
2016	171	215	00:07:00	LittleJane	2	female	yes	Zsabu	male	Jan-Zsa	todom	hoot	pos	SG	avoid
2016	172	216	00:07:00	Debbie	2	female	no	Zsabu	male	Deb-Zsa	todom	NA	pos	SG	avoid
2016	173	216	00:16:00	Max	2	male	yes	Zsabu	male	Max-Zsa	todom	hoot	pos	BG	avoid
2016	174	220	00:09:00	Tess	2	female	yes	Zsabu	male	Tes-Zsa	todom	hoot	pos	BG	avoid
2016	175	221	00:08:00	Tess	2	female	no	Zsabu	male	Tes-Zsa	todom	hoot	pos	SG	avoid
2016	176	222	00:07:00	Tara	2	male	no	Pal	male	Tar-Pal	nottodom	hoot	pos	BG	affil
2016	177	224	00:12:00	Mojo	2	male	yes	Pan	male	Moj-Pan	todom	hoot	pos	SG	avoid
2016	178	224	00:25:00	Mojo	2	male	yes	LittleJane	female	Moj-Jan	nottodom	neutral	pos	SG	avoid
2016	179	224	00:26:00	Mojo	2	male	yes	LittleJane	female	Moj-Jan	todom	neutral	pos	BG	avoid
2016	181	228	00:05:00	Gerard	1	male	yes	Rusty	male	Ger-Rus	nottodom	NA	pos	SG	avoid
2016	182	230	00:05:00	Innocentia	1	female	yes	Ingrid	female	Inn-Ing	todom	NA	pos	BG	avoid
2016	182	140	00:00:00	Booboo	1	male	NA	Girly	female	Boo-Gir	nottodom	hoot	NA	SG	affil
2016	183	230	00:18:00	Ireen	1	female	yes	Genny	female	Ire-Gen	todom	NA	pos	SG	avoid
2016	184	231	00:05:00	Ingrid	1	female	yes	Tobar	male	Ing-Tob	todom	NA	pos	BG	avoid
2016	185	143	00:04:00	LittleJudy	2	female	yes	Diz	female	Jud-Diz	nottodom	bared	pos	SG	affil
2016	189	146	00:08:00	Girly	1	female	yes	Pal	male	Gir-Pal	todom	neutral	pos	BG	affil
2016	224	170	00:04:00	Ingrid	1	female	yes	Pal	male	Ing-Pal	todom	hoot	pos	SG	avoid
2016	227	172	00:02:00	Debbie	2	female	NA	Zsabu	male	Deb-Zsa	todom	hoot	pos	BG	avoid
2016	257	194	00:05:00	Diz	2	female	yes	Mojo	male	Diz-Moj	todom	neutral	pos	SG	affil
2016	266	202	00:07:00	Brenda	1	female	no	Booboo	male	Bre-Boo	todom	hoot	pos	SG	avoid
2016	274	207	00:04:00	Rita	1	female	no	Renate	female	Rit-Ren	nottodom	neutral	pos	SG	affil
2016	276	209	00:04:00	BJ	1	female	yes	Bob	male	BJ-Bob	todom	hoot	pos	BG	avoid
2016	277	210	00:08:00	BJ	1	female	yes	Bob	male	BJ-Bob	todom	hoot	pos	SG	avoid
2016	289	217	00:06:00	Tilly	2	female	no	Zsabu	male	Til-Zsa	todom	hoot	pos	SG	avoid
2016	297	224	00:12:00	LongJohn	2	male	yes	Pan	male	Joh-Pan	todom	hoot	pos	BG	affil
2016	315	232	00:07:00	Debbie	2	female	no	Zsabu	male	Deb-Zsa	todom	hoot	pos	SG	avoid
2016	316	232	00:08:00	Mojo	2	male	no	Debbie	female	Moj-Deb	todom	neutral	pos	SG	avoid
2016	317	233	00:08:00	Tess	2	female	yes	Zsabu	male	Tes-Zsa	todom	hoot	pos	BG	avoid
2016	320	235	00:11:00	LittleJane	2	female	yes	Pan	male	Jan-Pan	todom	neutral	pos	SG	avoid
2016	326	240	00:05:00	Genny	1	female	no	Bob	male	Gen-Bob	todom	hoot	pos	SG	avoid
2016	327	240	00:09:00	Rusty	1	male	yes	Bob	male	Rus-Bob	todom	hoot	pos	BG	avoid
2016	328	240	00:23:00	Rusty	1	male	yes	Girly	female	Rus-Gir	todom	hoot	pos	SG	affil
2016	332	242	00:11:00	Booboo	1	male	yes	Bob	male	Boo-Bob	todom	neutral	pos	SG	avoid
2016	336	246	00:05:00	Pan	2	male	yes	Carol	female	Pan-Car	nottodom	neutral	neg	SG	avoid
2016	338	248	00:05:00	Ida	1	female	no	Brenda	female	Ida-Bre	todom	neutral	pos	SG	affil
2016	340	249	00:16:00	Gonzaga	1	female	yes	Bob	male	Gon-Bob	todom	hoot	pos	SG	avoid
2016	342	251	00:06:00	Booboo	1	male	yes	Pal	male	Boo-Pal	todom	bared	pos	BG	avoid
2016	343	252	00:04:00	Booboo	1	male	yes	Pal	male	Boo-Pal	todom	bared	pos	BG	avoid
2016	344	252	00:23:00	Booboo	1	male	yes	Bob	male	Boo-Bob	todom	bared	pos	SG	avoid
2016	347	255	00:08:00	Pan	2	male	yes	LittleJack	male	Pan-Jac	nottodom	neutral	pos	SG	affil
2016	355	261	00:05:00	Pan	2	male	no	LittleJack	male	Pan-Jac	nottodom	neutral	pos	SG	affil
2016	356	262	00:06:00	Pan	2	male	no	LittleJack	male	Pan-Jac	nottodom	neutral	pos	SG	affil
2016	357	263	00:04:00	Pan	2	male	no	LittleJack	male	Pan-Jac	nottodom	neutral	pos	SG	affil
2016	358	264	00:05:00	Pan	2	male	no	LittleJones	male	Pan-Jon	nottodom	neutral	pos	SG	affil
2016	369	275	00:02:00	Maggie	2	female	no	Max	male	Mag-Max	nottodom	hoot	neg	SG	avoid
2016	372	278	00:05:00	Mojo	2	male	no	Pan	male	Moj-Pan	todom	hoot	pos	SG	avoid
2016	386	289	00:06:00	Tess	2	female	yes	Zsabu	male	Tes-Zsa	todom	hoot	pos	SG	avoid
2016	390	293	00:06:00	Debbie	2	female	no	Zsabu	male	Deb-Zsa	todom	neutral	pos	SG	avoid
2016	394	294	00:08:00	Doug	2	male	no	Zsabu	male	Dou-Zsa	todom	hoot	pos	SG	avoid
2016	397	296	00:17:00	Gerard	1	male	yes	Bob	male	Ger-Bob	todom	hoot	pos	SG	affil
2016	418	311	00:05:00	Gerard	1	male	yes	Girly	female	Ger-Gir	nottodom	neutral	pos	SG	avoid
2016	421	313	00:02:00	Nina	2	female	yes	Nikkie	female	Nin-Nik	todom	hoot	pos	BG	avoid
2016	426	315	00:04:00	Maggie	2	female	no	May	female	Mag-May	nottodom	hoot	pos	SG	affil
2016	428	316	00:12:00	Gerard	1	male	no	Tara	male	Ger-Tar	todom	hoot	pos	SG	avoid
2016	429	317	00:08:00	Chrissy	1	female	yes	Tara	male	Chr-Tar	todom	hoot	pos	BG	avoid
2016	431	319	00:04:00	Debbie	2	female	no	Zsabu	male	Deb-Zsa	todom	hoot	pos	SG	avoid
2016	471	349	00:09:00	Girly	1	female	no	Pal	male	Gir-Pal	todom	hoot	pos	BG	avoid
2016	474	352	00:06:00	Maggie	2	female	yes	Zsabu	male	Mag-Zsa	todom	hoot	neg	SG	avoid
2016	475	353	00:05:00	Tess	2	female	yes	Zsabu	male	Tes-Zsa	todom	hoot	pos	SG	avoid
2016	483	358	00:06:00	Booboo	1	male	no	Tobar	male	Boo-Tab	NA	bared	pos	SG	affil
2016	502	371	00:05:00	Debbie	2	female	yes	Zsabu	male	Deb-Zsa	todom	hoot	pos	SG	avoid
2016	503	372	00:05:00	Taylor	2	female	yes	Toni	female	Tay-Ton	nottodom	neutral	pos	BG	avoid
2016	506	375	00:05:00	Tara	1	male	no	Girly	female	Tar-Gir	nottodom	neutral	pos	SG	affil
2016	508	377	00:09:00	Doug	2	male	yes	Zsabu	male	Dou-Zsa	todom	bared	pos	BG	avoid
2016	517	385	00:07:00	LittleJudy	2	female	yes	Nina	female	Jud-Nin	nottodom	hoot	pos	SG	avoid
2016	519	387	00:08:00	Debbie	2	female	yes	Pan	male	Deb-Pan	todom	neutral	pos	SG	avoid
2016	520	388	00:08:00	Debbie	2	female	no	Pan	male	Deb-Pan	todom	neutral	pos	SG	avoid
2016	522	390	00:05:00	LittleJudy	2	female	no	Zsabu	male	Jud-Zsa	todom	hoot	pos	BG	avoid
2016	524	391	00:05:00	Nina	2	female	no	Nancy	female	Nin-Nan	nottodom	neutral	pos	SG	affil
2016	530	397	00:06:00	Debbie	2	female	yes	Pan	male	Deb-Pan	todom	neutral	pos	BG	affil
2016	532	399	00:07:00	Doug	2	male	no	LittleJenkins	female	Dou-Jen	nottodom	hoot	neg	SG	avoid
2016	226a	171	00:06:00	Girly	1	female	yes	Pal	male	Gir-Pal	todom	neutral	pos	SG	affil
2016	226b	171	00:07:00	Pal	1	male	no	Girly	female	Pal-Gir	nottodom	neutral	pos	SG	affil
2016	300b	225	00:19:00	Diz	2	female	yes	Diana	female	Diz-Dia	todom	hoot	pos	SG	avoid

## Sheet: Model formula
full = glmer (REACT ~ sex_init + sex_rec + rel_dom + dataset + group +
(1|initiator) + (1|recipient) + (1|dyad) + (1|xx),
data=sdata, family=binomial, control=contr)
Response variable = Response of the recipient (binary coded, affiliation vs non-affiliative)
xx = gesture, face, context (all variables with multiple levels, included as random effect)
Control variables = sex, rank relation, ID, group, year of observation
